# Supplementary material
Source: publisher figshare collection journal article supplement (https://rs.figshare.com/ndownloader/files/17811179)
Supplement: Supplementary file [file 17811179]

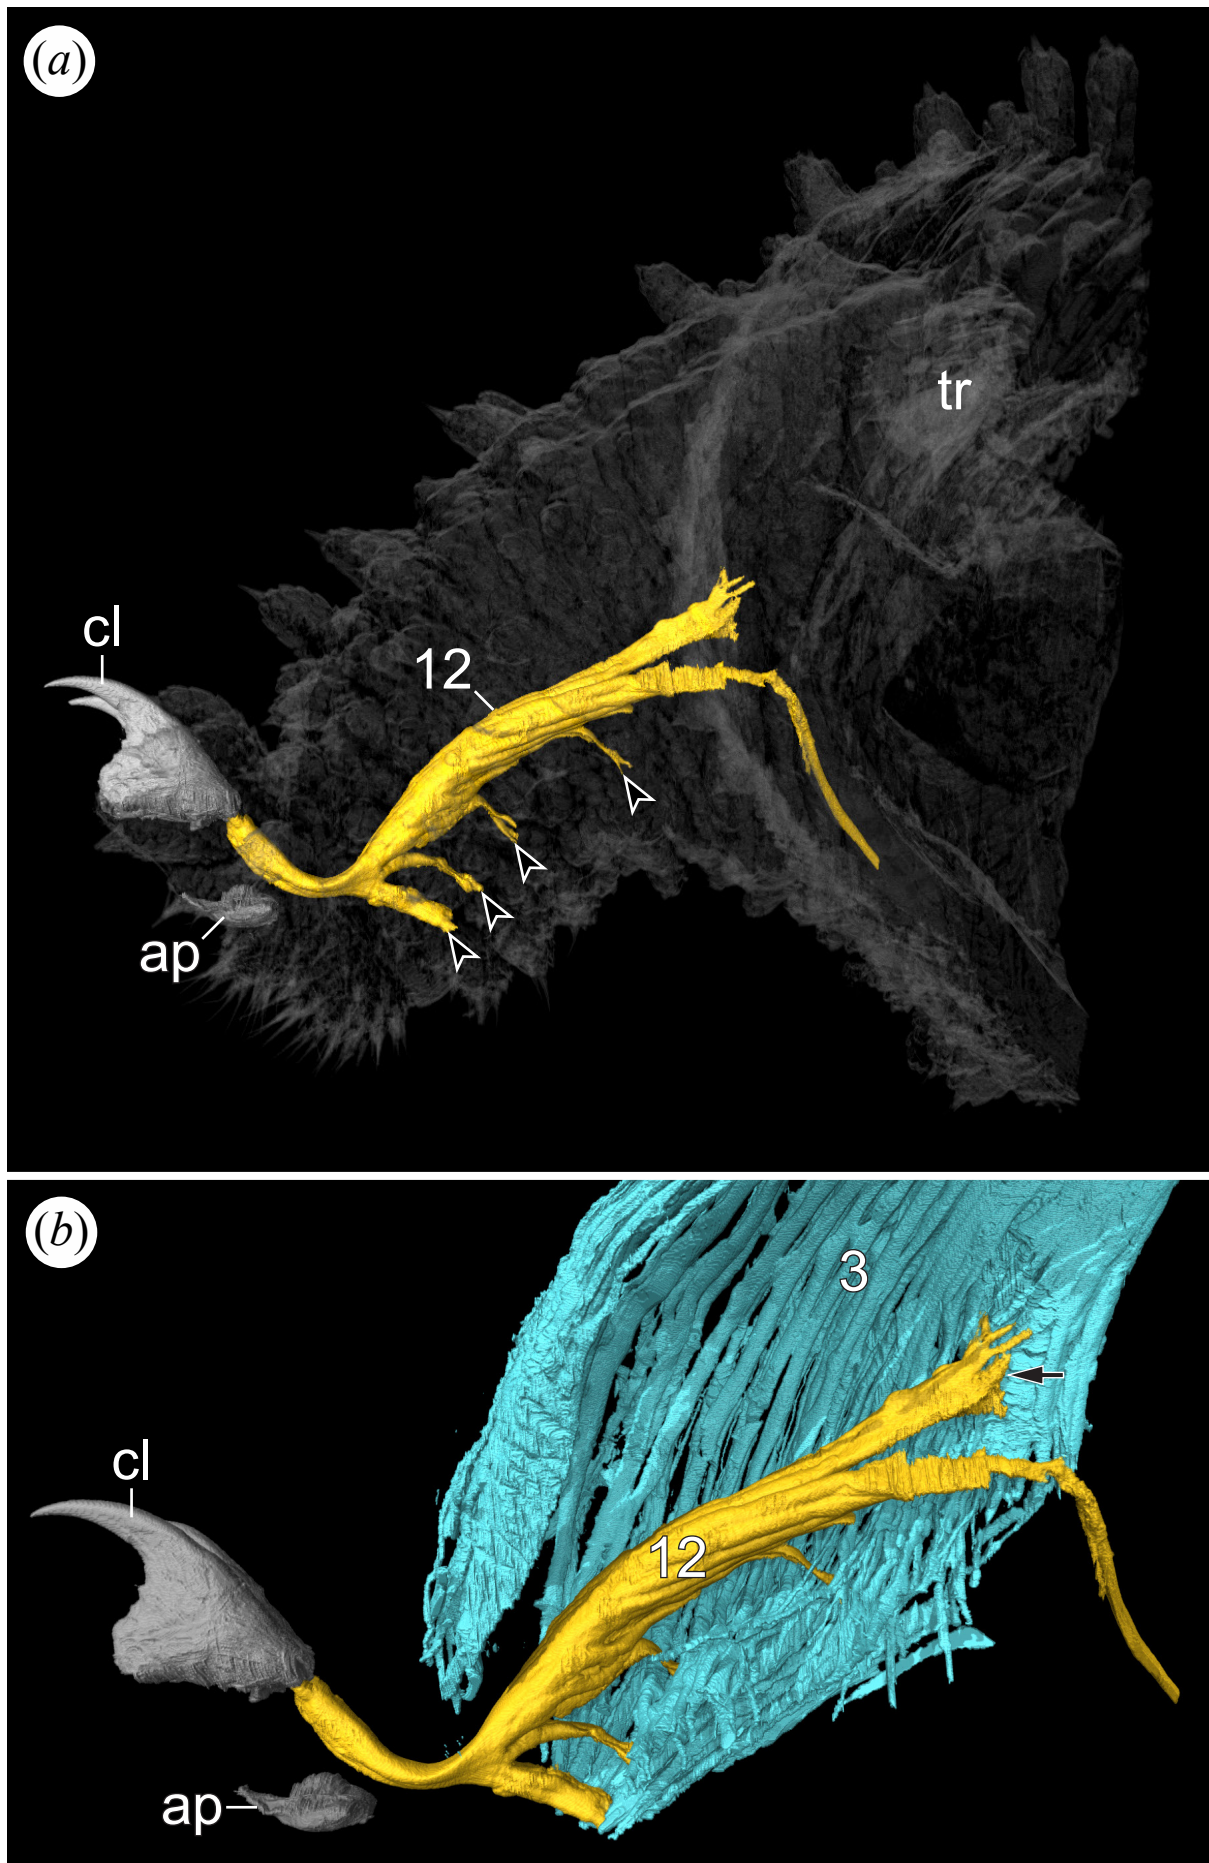

**Supplementary Figure 7. Morphology of the claw retractor muscle in *E. rowelli*.** Volume rendering based on nanoCT data from left mid-trunk leg. Dorsal is up in all images. Body surface is semi-transparent in **a**. **(a)** Structure and position of the claw retractor muscle (#12) inside the leg. Arrowheads point to set of muscle fibres that branch off ventrally from this muscle. **(b)** Spatial relationship between the claw retractor (#12) and the leg promotor (#3). Note that the dorsoproximal fibres of the claw retractor (arrow) fuses with those of the leg promotor. Abbreviations: ap, foot apodeme; cl, claw; tr, trunk.
